# Supplementary material
Source: PubMed Central journal article supplement (PMC2773086)
Supplement: pp.109.144824_1.pdf [file pp.109.144824_1.pdf]

Table S1: Summary of differentially regulated genes<sup>1</sup>

| <b>General Pathway</b>                             | <b>15 min</b> | <b>45 min</b> | <b>1.5 h</b> | <b>2 h</b> | <b>3 h</b> | <b>6 h</b> | <b>Total Genes</b> |
|----------------------------------------------------|---------------|---------------|--------------|------------|------------|------------|--------------------|
| Amino acid biosynthesis                            | 13            | 12            | 10           | 17         | 17         | 23         | 37                 |
| Biosynthesis of cofactors, and prosthetic groups   | 17            | 19            | 12           | 17         | 17         | 23         | 41                 |
| Cell envelope                                      | 12            | 9             | 3            | 12         | 11         | 16         | 25                 |
| Cellular processes                                 | 19            | 18            | 13           | 15         | 17         | 17         | 39                 |
| Central intermediary metabolism                    | 3             | 3             | 2            | 1          | 2          | 7          | 11                 |
| DNA replication                                    | 4             | 8             | 2            | 2          | 2          | 3          | 13                 |
| Energy metabolism                                  | 17            | 16            | 10           | 13         | 19         | 19         | 37                 |
| Fatty acid, phospholipid and sterol metabolism     | 6             | 7             | 4            | 7          | 9          | 8          | 19                 |
| Photosynthesis and respiration                     | 48            | 59            | 36           | 31         | 37         | 51         | 100                |
| Purines, pyrimidines, nucleosides, and nucleotides | 4             | 3             | 1            | 2          | 3          | 3          | 6                  |
| Regulatory functions                               | 22            | 21            | 16           | 24         | 23         | 22         | 49                 |
| Transcription                                      | 10            | 9             | 2            | 7          | 7          | 14         | 21                 |
| Translation                                        | 57            | 54            | 21           | 25         | 33         | 44         | 97                 |
| Transport and binding proteins                     | 29            | 18            | 10           | 19         | 21         | 32         | 55                 |
| Other categories                                   | 34            | 27            | 19           | 25         | 27         | 31         | 73                 |
| Hypothetical                                       | 182           | 136           | 98           | 131        | 157        | 201        | 395                |
| Unknown                                            | 82            | 72            | 38           | 55         | 80         | 85         | 174                |
| Not Specified <sup>2</sup>                         | 5             | 6             | 1            | 6          | 5          | 4          | 10                 |
| <b>Total</b>                                       | <b>564</b>    | <b>497</b>    | <b>298</b>   | <b>409</b> | <b>487</b> | <b>603</b> | <b>1202</b>        |

<sup>1</sup>Genes were considered as differentially regulated if the fold change was  $>\pm 1.3$  and p value  $<0.01$

<sup>2</sup>Probes belonging to ORF that were not identified by Kazusa
